# Supplementary material
Source: PubMed Central journal article supplement (PMC4554552)
Supplement: Supp_Figure3.pdf [file Supp_Figure3.pdf]

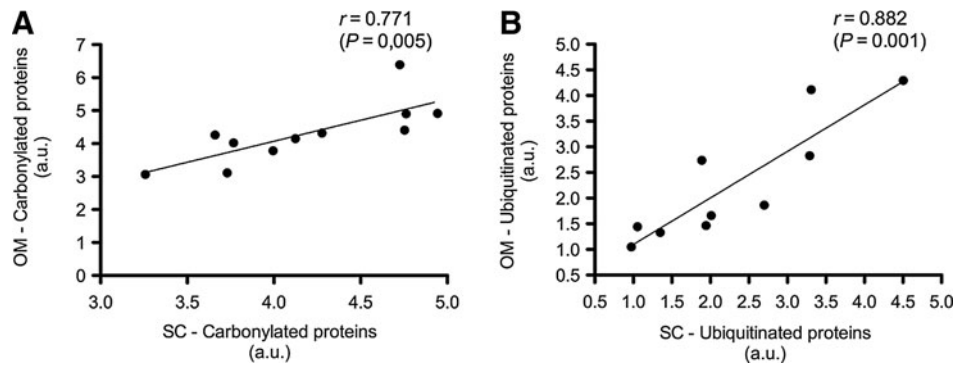

**SUPPLEMENTARY FIG. S3. Correlation of carbonylated and ubiquitinated proteins between human SC and OM adipocytes.** (A) Levels of carbonylated and (B) ubiquitinated proteins positively correlate between paired SC and OM adipocytes. Pearson's correlation ( $r$ ) and  $p$ -value are indicated for each graph.
