# Supplementary material
Source: PubMed Central journal article supplement (PMC4554552)
Supplement: Supp_Figure4.pdf [file Supp_Figure4.pdf]

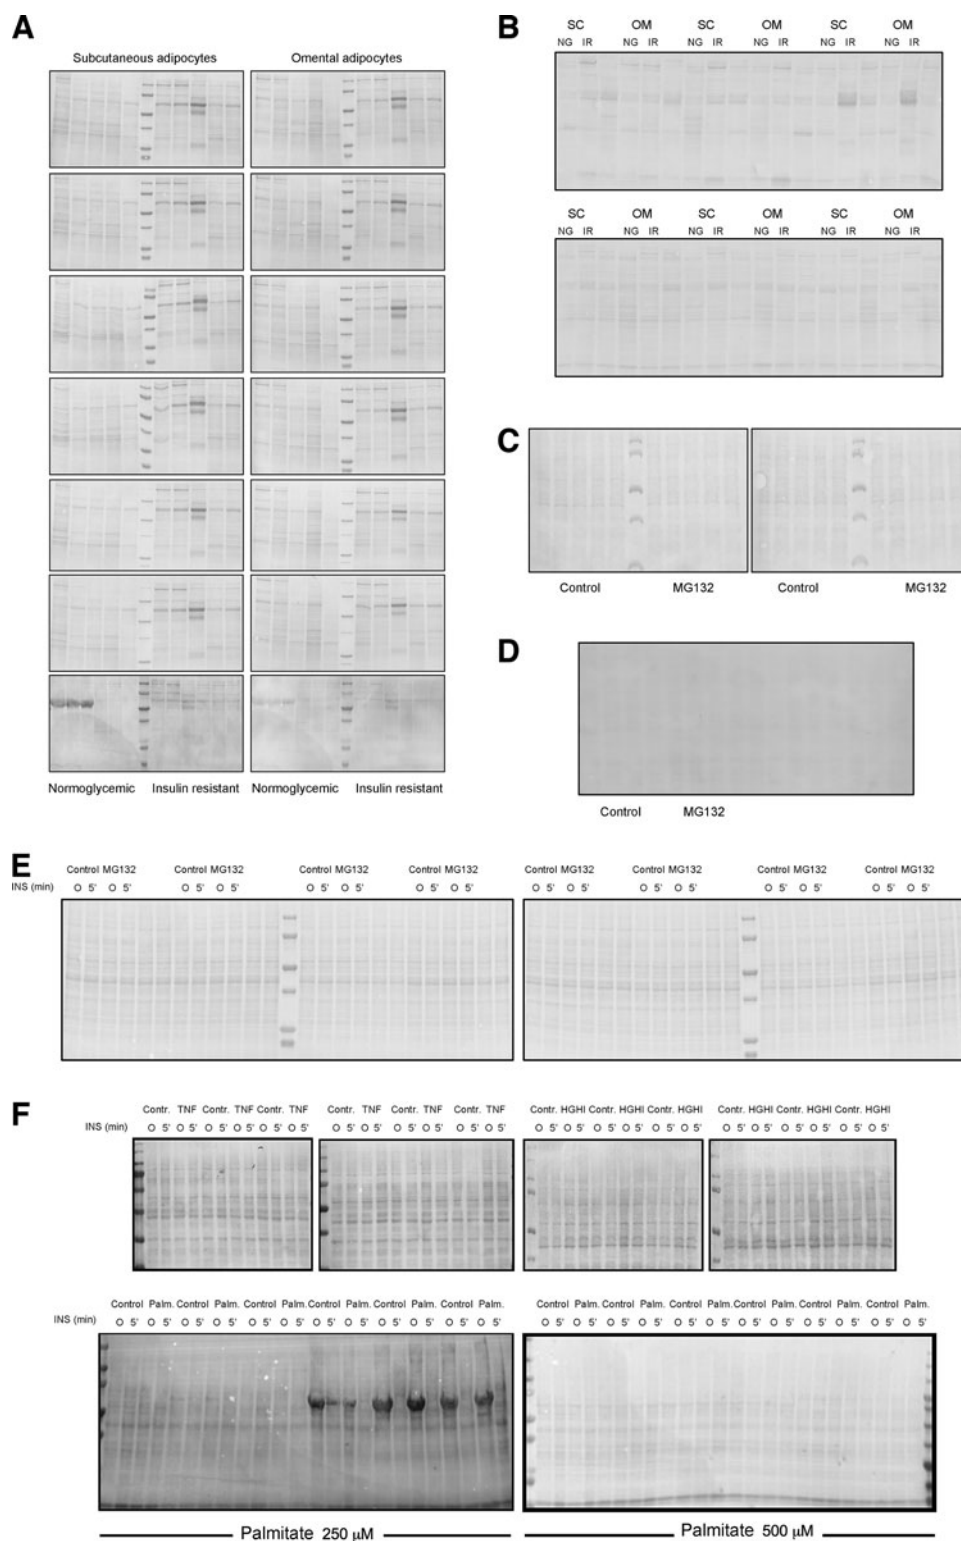

**SUPPLEMENTARY FIG. S4. Uncropped Ponceau images for the main figures: (A)** Related to Figures 2A, C, D, 3A, B, and 5 **(B)** Related to Figure 2E, **(C)** Related to Figure 6A, **(D)** Related to Figure 6B, **(E)** Related to Figure 6D, and **(F)** Related to Figure 7B and D.
