# Supplementary material
Source: PubMed Central journal article supplement (PMC4554552)
Supplement: Supp_Table1.pdf [file Supp_Table1.pdf]

## Supplementary Data

SUPPLEMENTARY TABLE S1. LIST OF ANTIBODIES

| <i>Antibody</i>                | <i>Commercial source</i> | <i>Reference</i> | <i>Host species</i> | <i>Dilution</i> |
|--------------------------------|--------------------------|------------------|---------------------|-----------------|
| Anti-GSHB                      | Abcam                    | EPR6563          | Rabbit              | 1/750           |
| Anti-DJ1/PARK7                 | Santa Cruz               | sc-32874         | Rabbit              | 1/500           |
| Anti-NQO1                      | Santa Cruz               | sc-16464         | Goat                | 1/250           |
| Anti-HSP70                     | Biomedal                 | ab-5039          | Rabbit              | 1/500           |
| Anti-JNK                       | RD Systems               | AF1387           | Rabbit              | 1/1000          |
| Anti-phosphoJNK (T183/Y185)    | RD Systems               | AF1205           | Rabbit              | 1/1000          |
| Anti-IRS-1                     | Santa Cruz               | sc-7200          | Rabbit              | 1/500           |
| Anti-phosphoIRS-1 (Ser307)     | Santa Cruz               | sc-33956         | Rabbit              | 1/500           |
| Anti-Akt                       | Cell Signalling          | 9272             | Rabbit              | 1/1000          |
| Anti-phosphoAkt (Ser473)       | Cell Signalling          | 4060             | Rabbit              | 1/1000          |
| Anti-CHOP                      | Cell Signalling          | 2895             | Mouse               | 1/1000          |
| Anti-Bcl-2                     | Santa Cruz               | sc-492           | Rabbit              | 1/250           |
| Anti-Bax                       | Santa Cruz               | sc-7480          | Mouse               | 1/500           |
| Anti-Actin                     | Sigma                    | A5441            | Mouse               | 1/10000         |
| Anti-Dinitrophenyl-KLH (DNP)   | RD Systems               | A64535           | Mouse               | 1/2000          |
| Anti-4-Hydroxynonenal (4-HNE)  | RD Systems               | MAB3249          | Mouse               | 1/500           |
| Anti-Ubiquitin                 | Boston Biochem           | A-100            | Rabbit              | 1/500           |
| Anti-Rabbit IgG peroxidase     | Sigma                    | A-8275           | Rabbit              | 1/2500          |
| Anti-Mouse IgG peroxidase      | Sigma                    | A-9044           | Mouse               | 1/2500          |
| Anti-Goat/Sheep IgG peroxidase | Sigma                    | A-9452           | Goat                | 1/2500          |
